# Supplementary material for: The Clinical Utility of Genetic Testing in the Diagnosis and Management of Adults with Chronic Kidney Disease
Source: PubMed Central journal article supplement (PMC10703084; doi:10.1681/asn.0000000000000249), 2023-10-05
Supplement: jasn-34-2039-s001.pdf [file jasn-34-2039-s001.pdf]

## The Clinical Utility of Genetic Testing in the Diagnosis and Management of Adults With Chronic Kidney Disease

Neera Dahl, MD, PhD;<sup>1</sup> Michelle S. Bloom, PhD;<sup>2</sup> Fouad T. Chebib, MD;<sup>3</sup> Dinah Clark, MS CGC;<sup>2</sup> Maggie Westemeyer, MS CGC;<sup>2</sup> Sara Jandeska, MD;<sup>2</sup> Zhiji Zhang, MS;<sup>2</sup> Hila Milo Rasouly, PhD;<sup>4</sup> Victoria Kolupaeva, PhD;<sup>4</sup> Maddalena Marasa, MD;<sup>4</sup> Varshasb Broumand, MD;<sup>5</sup> Richard A Fatica, MD;<sup>6</sup> Dominic S Raj, MD;<sup>7</sup> Zachary P. Demko, PhD;<sup>2</sup> Kyle Marshall, MS;<sup>2</sup> Sumit Punj, PhD FACMG;<sup>2</sup> Hossein Tabriziani, MD;<sup>2</sup> Sangeeta Bhorade, MD;<sup>2</sup> Ali G. Gharavi, MD<sup>4</sup>

1. Division of Nephrology and Hypertension, Mayo Clinic, Rochester, MN, USA
2. Natera, Inc., Austin, TX, USA
3. Division of Nephrology and Hypertension, Mayo Clinic, Jacksonville, FL, USA
4. Division of Nephrology, Department of Medicine, Columbia University College of Physicians and Surgeons, New York, NY, USA
5. South Texas Renal Care Group, San Antonio, TX, USA
6. Department of Kidney Medicine, Cleveland Clinic, Cleveland, OH, USA
7. Division of Kidney Diseases and Hypertension, George Washington University School of Medicine and Health Sciences, Washington, DC, USA

### Table of Contents

|                                                                                                            |           |
|------------------------------------------------------------------------------------------------------------|-----------|
| <b>Table S1: List of RenaCARE Investigators and Sites .....</b>                                            | <b>2</b>  |
| <b>Figure S1: Locations of RenaCARE Sites .....</b>                                                        | <b>3</b>  |
| <b>Figure S2. CONSORT Diagram for RenaCARE Trial. ....</b>                                                 | <b>4</b>  |
| <b>Table S2: Study inclusion and exclusion criteria .....</b>                                              | <b>5</b>  |
| <b>Supplemental Methods.....</b>                                                                           | <b>6</b>  |
| Collection of baseline information .....                                                                   | 6         |
| Classification of genetic diagnosis .....                                                                  | 6         |
| <b>Table S3: Baseline clinical data and histories .....</b>                                                | <b>7</b>  |
| <b>Table S4: Pre-Test Physician Questionnaire .....</b>                                                    | <b>8</b>  |
| <b>Table S5: Post-Test Physician Questionnaire (One Month Follow-Up) .....</b>                             | <b>9</b>  |
| <b>Table S6: Patients with IFT140 loss-of-function variants .....</b>                                      | <b>12</b> |
| <b>Table S7: Patients with reclassification of VUS to P/LP positive genetic finding .....</b>              | <b>12</b> |
| <b>Table S8: Cases with Multiple Positive Findings.....</b>                                                | <b>13</b> |
| <b>Table S9: Frequency of positive gene findings according to pre-test clinical disease category .....</b> | <b>15</b> |
| <b>Table S10: Patients with Reclassified Diagnoses .....</b>                                               | <b>17</b> |
| <b>Table S11: Patients for whom biopsy was not pursued based on genetic test results .....</b>             | <b>18</b> |
| <b>Table S12: Patients with Positive Genetic Findings that were Biopsied Prior to Genetic Testing ...</b>  | <b>19</b> |

**Table S1: List of RenaCARE Investigators and Sites**

| <b>Investigator</b>                           | <b>Institution</b>                                                                                          | <b>City</b>  | <b>State</b> |
|-----------------------------------------------|-------------------------------------------------------------------------------------------------------------|--------------|--------------|
| Ali Gharavi, MD                               | Columbia University Irving Medical Center<br>Dept of Medicine                                               | New York     | NY           |
| Arman Faravardeh, MD,<br>FACP                 | Balboa/California Institute of Renal Research<br>(CIRR)                                                     | San Diego    | CA           |
| Syeda Ahmad, MD                               | University of Pittsburgh Medical Center<br>(UPMC) -<br>Department of Medicine Renal Electrolyte<br>Division | Pittsburg    | PA           |
| Dominic Raj, MBBS, MD,<br>DM, DNB, FASN, FACP | George Washington Medical Faculty<br>Associates                                                             | Washington   | DC           |
| Simin Goral, MD                               | University of Pennsylvania - Renal,<br>Electrolyte, and Hypertension Dept                                   | Philadelphia | PA           |
| Chebib Fouad, MD, FASN                        | Mayo (Rochester)                                                                                            | Rochester    | MN           |
| Neera Dahl, MD, PhD                           | Yale university                                                                                             | New Haven    | CT           |
| Maryam Gondal, MBBS,<br>MD                    | Yale university                                                                                             | New Haven    | CT           |
| Reza Mizani, MD, FASN                         | Texas Kidney Care                                                                                           | San Antonio  | TX           |
| Richard Fatica, MD                            | Cleveland Clinic                                                                                            | Cleveland    | OH           |
| Melanie Barrido, MD,<br>FASN                  | NANI (Fort Wayne)                                                                                           | Fort Wayne   | IN           |
| Robert Szewc, MD                              | Kidney & Hypertension Transplant Associates                                                                 | San Antonio  | TX           |
| Harmeet Singh, MD,<br>FASN, FACP              | Western Nephrology and Metabolic Bone<br>Disease, PC                                                        | Denver       | CO           |
| Suneel Udani, MD                              | NANI (Hinsdale)                                                                                             | Hinsdale     | IL           |
| Neville Dossabhoy, MD,<br>FACP, FASN          | University of MS Medical Center                                                                             | Jackson      | MS           |
| Carl Dukes, MD, FACP,<br>FASN                 | US Renal Care (USRC) - Houston St.                                                                          | San Antonio  | TX           |
| Carolina Arias, MD                            | South Texas Renal Care Group (USRC)                                                                         | San Antonio  | TX           |
| F. David Newby, MD, PhD                       | Nephrology & Hypertension Specialists, PC<br>(USRC)                                                         | Dalton       | GA           |
| David Lefler, DO                              | Liberty Dialysis/US Renal Care (USRC)                                                                       | Anchorage    | AK           |
| Varshi Broumand, MD,<br>MHA, FACP, FASN       | US Renal Care (USRC) - Westover Hills                                                                       | San Antonio  | TX           |
| Ayodele Erinle, MD, FACP                      | USRC Kidney Research (USRC)                                                                                 | Gallup       | NM           |
| Dayan Gandhi, MD, MSc                         | Renal Consultants Medical Group (part of<br>USRC)                                                           | Northridge   | CA           |
| Nelson Kopyt, DO, FASN,<br>FNKF, FACP, CPI    | Northeast Clinical Research Center                                                                          | Bethlehem    | PA           |

|                                |                                                                                      |                  |    |
|--------------------------------|--------------------------------------------------------------------------------------|------------------|----|
| Vladimir Liberman, DO          | PRINE Health                                                                         | Rockville Center | NY |
| Melchior Vernace, MD, FACP     | Doylestown Hospital                                                                  | Doylestown       | PA |
| George Frem, MD, FACP, FASN    | Renal Care Consultants P.C.                                                          | Johnstown        | PA |
| Astha Gupta, MD                | Einstein Medical Center                                                              | Philadelphia     | PA |
| William Hoffman, MD            | UPMC Pinnacle Harrisburg                                                             | Harrisburg       | PA |
| Yeong-Hau Howard Lien, MD, PhD | AKDHC Medical Research Services, LLC (Arizona Kidney Disease & Hypertension Centers) | Bullhead City    | AZ |
| Anup Patel, MD                 | Saint Barnabas Medical Center                                                        | Livingston       | NJ |
| Syed Babar, MBBS, MD           | Southeastern Clinical Research Institute, LLC                                        | Augusta          | GA |
| Naveed Masani, MD, FACP, FASN  | NYU Langone Hospital—Long Island                                                     | Long Island      | NY |

Figure S1: Locations of RenaCARE Sites

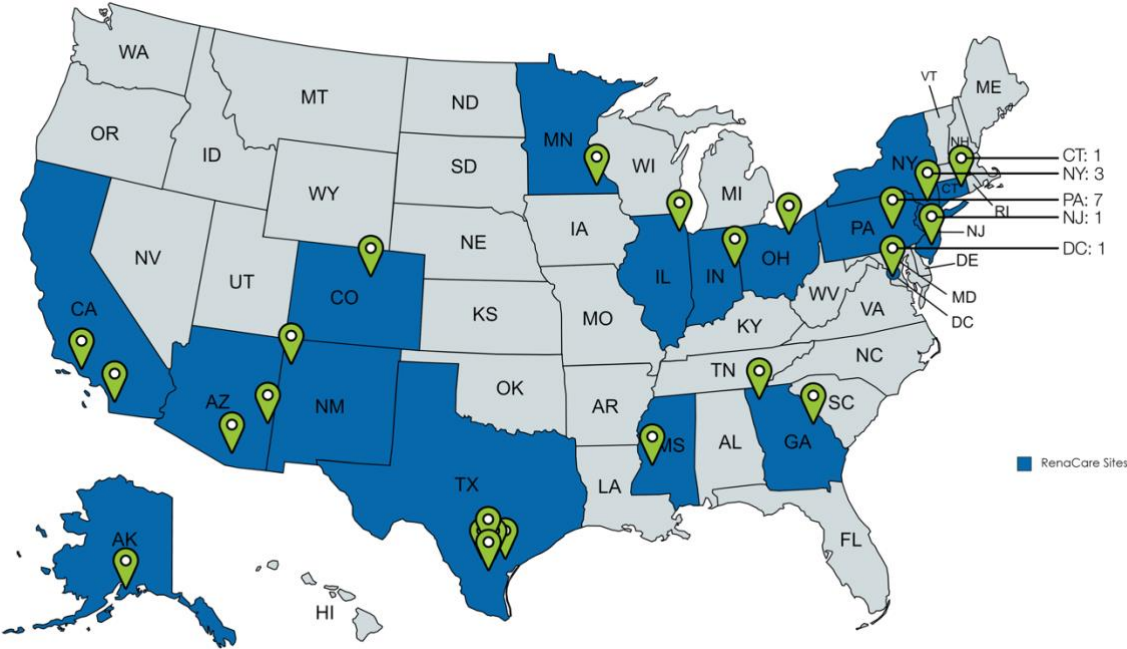

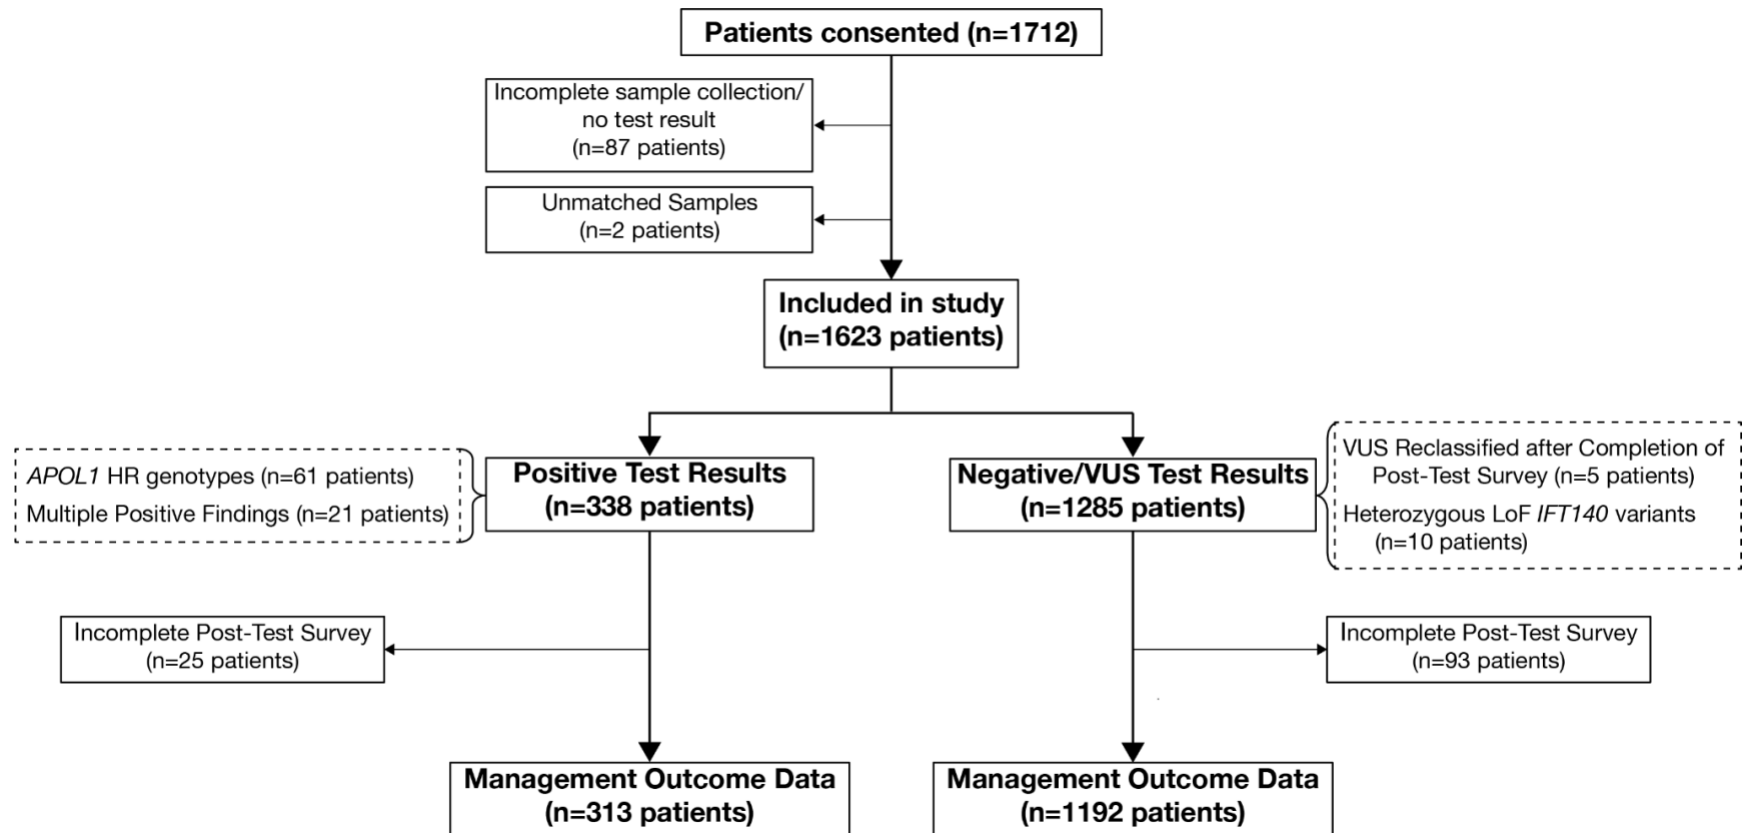

**Figure S2. CONSORT Diagram for RenaCARE Trial.**

CONSORT flow diagram shows the classification of patients according to positive or negative result. A total of 338 patients had positive genetic results, including 61 patients with high risk *APOL1* genotypes. Among the positive patients, 21 had more than one genetic finding, resulting in a total of 362 positive genetic findings. The diagram shows patients with completed management outcome data within each subgroup. These patients were used to evaluate clinical utility of genetic testing

**Table S2: Study inclusion and exclusion criteria**

**Inclusion criteria**

---

- ✓ 18 years and older at time of signing the informed consent
- ✓ For patients 65 years and older: absence of family history of CKD or suspicion of genetic etiology of kidney disease
- ✓ Diagnosis kidney disease, and/or one of the following:
  - Kidney disease not otherwise specified
  - Nephropathy associated with diabetes mellitus
  - Nephropathy associated with hypertension
  - Cystic nephropathy
  - Chronic kidney disease of unknown cause after standard nephrological evaluation
  - End stage renal disease
  - Congenital nephropathy
  - Tubulointerstitial disease of unknown etiology
  - Proteinuria disease suggestive of a primary glomerulopathy
  - Hematuria
  - Early onset, severe, or familial hypertension
  - Thrombotic microangiopathy
  - Electrolyte and/or acid-base disorder
  - Nephrolithiasis with family history
- ✓ Able to read, understand, provide written informed consent
- ✓ Willing and able to comply with the study-related procedures

**Exclusion criteria**

---

- ✓ History of kidney transplant
- ✓ Clinical features and kidney biopsy diagnosis strongly indicative of a secondary nephropathy (e.g., diabetic nephropathy, lupus nephritis, acute kidney injury)
- ✓ Previously confirmed diagnosis of a monogenic etiology of kidney disease from previous genetic testing
- ✓ Receipt of blood transfusion within 30 days of study blood draw

## Supplemental Methods

### *Collection of baseline information*

At the time of enrollment, physicians provided baseline (pre-test) information for each patient which included patient demographic data, clinical signs and symptoms, past medical history including medications, family history, laboratory data, imaging studies, and renal biopsy findings if available (**Table S2**).

The physician pre-test questionnaire included ten multiple-choice questions and free text inquiring about the patient's clinical diagnosis; anticipated prognosis; treatment plan; consideration for biopsy; subspecialty referral; presence of extrarenal disease and the reason for genetic testing (**Table S3**).

The physician post-test questionnaires documented additional diagnostic testing, changes to medications, referrals to clinical trials, evaluation of extrarenal disease, use of genetic counselors and subspecialists, plan for renal biopsy, and recommendation of at-risk family members to seek genetic testing (**Table S4**).

### *Classification of genetic diagnosis*

Adjudication of the patients clinical diagnosis (including both medical history/clinical information and clinical kidney disease categorization, if provided) with genetic findings:

1. A case was defined as "confirm" when the condition associated with the genetic finding was consistent with the pre-test clinical diagnosis.
2. A case was defined as "diagnose" or "diagnose, partial" when the condition associated with the genetic finding was consistent (or partially consistent) with the reported clinical findings but not specified by the physician in the patient history.
3. A case was defined as "reclassified" when the condition associated with the genetic finding was a new clinical diagnosis that differed from the pre-test clinical diagnosis.
4. A case was defined as "at-risk finding", when the patient did not appear to have signs or symptoms of the clinical diagnosis associated with the genetic finding but remained at risk for features of the genetic condition.

Cases with *APOL1* high-risk genotypes were considered only for the "diagnose, partial" or "at risk" categories. An *APOL1* case was categorized as "diagnose, partial" if the patient's clinical findings were within the *APOL1* spectrum of disease or as "at-risk" if *APOL1* could not explain the patient's findings (**Table S9**).

Cases with more than one positive finding were categorized based on the molecular finding that was presumed to be the primary driver of disease (**Table S7**).

**Table S3: Baseline clinical data and histories**

|                                                                                                                                                                                                                                                                                                                                                                                                                                                                                                                                                                                                                                                                                                                                                                                                                                                                                                                                                                                                                                                                                     |                                                                                                                                                                                                                                                                                                                                                                                                                                                                                                                                                                                                                                                                                                                                                                                                                                                                                                                                                                                                                                                                                                                                                           |                                                                                                                                                                                                                                                                                                                                                                                                                                                                                                                                                                                                                                                                                                                                                                                                                                                                                                                                                                                                                                               |
|-------------------------------------------------------------------------------------------------------------------------------------------------------------------------------------------------------------------------------------------------------------------------------------------------------------------------------------------------------------------------------------------------------------------------------------------------------------------------------------------------------------------------------------------------------------------------------------------------------------------------------------------------------------------------------------------------------------------------------------------------------------------------------------------------------------------------------------------------------------------------------------------------------------------------------------------------------------------------------------------------------------------------------------------------------------------------------------|-----------------------------------------------------------------------------------------------------------------------------------------------------------------------------------------------------------------------------------------------------------------------------------------------------------------------------------------------------------------------------------------------------------------------------------------------------------------------------------------------------------------------------------------------------------------------------------------------------------------------------------------------------------------------------------------------------------------------------------------------------------------------------------------------------------------------------------------------------------------------------------------------------------------------------------------------------------------------------------------------------------------------------------------------------------------------------------------------------------------------------------------------------------|-----------------------------------------------------------------------------------------------------------------------------------------------------------------------------------------------------------------------------------------------------------------------------------------------------------------------------------------------------------------------------------------------------------------------------------------------------------------------------------------------------------------------------------------------------------------------------------------------------------------------------------------------------------------------------------------------------------------------------------------------------------------------------------------------------------------------------------------------------------------------------------------------------------------------------------------------------------------------------------------------------------------------------------------------|
| <p><b>Demographics</b></p> <ul style="list-style-type: none"> <li>● Date of Birth:</li> <li>● Premature birth? Yes No</li> <li>● Birth Weight:</li> <li>● Age:</li> <li>● Sex at Birth: Male Female</li> <li>● Is subject pregnant? Yes No</li> <li>● Ethnicity:</li> <li>● Birth Weight:</li> <li>● Gestational Age: Weeks</li> <li>● Race:</li> </ul> <p><b>Family history</b></p> <ul style="list-style-type: none"> <li>● Family history of CKD: <ul style="list-style-type: none"> <li>○ Mother Father Sibling Child Other (free text)</li> </ul> </li> <li>● Family history of Hypertension: <ul style="list-style-type: none"> <li>○ Mother Father Sibling Child Other (free text)</li> </ul> </li> <li>● Family history of Nephrolithiasis: <ul style="list-style-type: none"> <li>○ Mother Father Sibling Child Other (free text)</li> </ul> </li> </ul> <p><b>Medications</b></p> <ul style="list-style-type: none"> <li>● Within 30 days prior to sample collection</li> <li>● clinically relevant changes in medication prescription/use at subsequent visit</li> </ul> | <p><b>Medical History</b></p> <ul style="list-style-type: none"> <li>● Hematuria</li> <li>● Allergic Disorders</li> <li>● Psychiatric Disorders</li> <li>● Proteinuria</li> <li>● Congenital Anomalies of Kidney and/or Urinary Tract</li> <li>● Polycystic or Cystic Nephropathy</li> <li>● Kidneys of Small Size</li> <li>● Lower Urinary Tract Obstruction</li> <li>● Kidney Stones/Nephrolithiasis</li> <li>● Electrolyte or Acid Base Disorder</li> <li>● Recurrent/Frequent UTIs</li> <li>● Exposure to Nephrotoxic Agents</li> <li>● Thrombotic Microangiopathy</li> <li>● Tubulointerstitial Disease</li> <li>● Cardiovascular Disease</li> <li>● Hypertension</li> <li>● Peripheral Arterial Disease</li> <li>● Stroke</li> <li>● Autoimmune Disease</li> <li>● Systemic Infections</li> <li>● Thromboembolic Events</li> <li>● Cancer</li> <li>● Gastrointestinal Disease</li> <li>● Lung Disease</li> <li>● Neurological</li> <li>● Sickle Cell Disease</li> <li>● Diabetes Mellitus Type 1</li> <li>● Diabetes Mellitus Type 2</li> <li>● Gestational Diabetes</li> <li>● Medication Related Diabetes</li> <li>● Other (free text)</li> </ul> | <p><b>Vital Signs at Baseline Visit</b></p> <ul style="list-style-type: none"> <li>● Collection Date:</li> <li>● Heart Rate:</li> <li>● Systolic Blood Pressure:</li> <li>● Diastolic Blood Pressure:</li> <li>● Height:</li> <li>● Weight:</li> </ul> <p><b>Laboratory Data</b></p> <ul style="list-style-type: none"> <li>● GFR (measured by 24 hour creatinine clearance)</li> <li>● GFR (measured by iothalamate clearance)</li> <li>● Renal Function Panel (Na, K, Cl, HCO<sub>3</sub>, BUN, Cr, glucose, Ca, alb, phosphorous)</li> <li>● 25OH &amp; 1,25OH vitamin D</li> <li>● Serum magnesium</li> <li>● Intact PTH</li> <li>● CBC</li> <li>● Hemoglobin</li> <li>● %HbA1c</li> <li>● lipid panel (total cholesterol, HDL, LDL, triglycerides)</li> <li>● B-type natriuretic peptide</li> <li>● random urine protein &amp; creatinine</li> <li>● 24-hour urine protein and creatinine</li> <li>● imaging studies ordered for kidney disease evaluation</li> <li>● renal biopsy if performed as part of patient evaluation</li> </ul> |
|-------------------------------------------------------------------------------------------------------------------------------------------------------------------------------------------------------------------------------------------------------------------------------------------------------------------------------------------------------------------------------------------------------------------------------------------------------------------------------------------------------------------------------------------------------------------------------------------------------------------------------------------------------------------------------------------------------------------------------------------------------------------------------------------------------------------------------------------------------------------------------------------------------------------------------------------------------------------------------------------------------------------------------------------------------------------------------------|-----------------------------------------------------------------------------------------------------------------------------------------------------------------------------------------------------------------------------------------------------------------------------------------------------------------------------------------------------------------------------------------------------------------------------------------------------------------------------------------------------------------------------------------------------------------------------------------------------------------------------------------------------------------------------------------------------------------------------------------------------------------------------------------------------------------------------------------------------------------------------------------------------------------------------------------------------------------------------------------------------------------------------------------------------------------------------------------------------------------------------------------------------------|-----------------------------------------------------------------------------------------------------------------------------------------------------------------------------------------------------------------------------------------------------------------------------------------------------------------------------------------------------------------------------------------------------------------------------------------------------------------------------------------------------------------------------------------------------------------------------------------------------------------------------------------------------------------------------------------------------------------------------------------------------------------------------------------------------------------------------------------------------------------------------------------------------------------------------------------------------------------------------------------------------------------------------------------------|

#### Table S4: Pre-Test Physician Questionnaire

1. What is your patient's clinical diagnosis (choose one)?
  - Nephropathy with diabetes mellitus
  - Nephropathy with hypertension
  - Cystic nephropathy
  - Congenital nephropathy
  - Tubulointerstitial disease of unknown etiology
  - Proteinuric disease suggestive of a primary glomerulopathy
  - Hematuria
  - Early onset, severe or familial hypertension
  - Thrombotic microangiopathy
  - Electrolyte and/or acid base disorder
  - Nephrolithiasis with family history
  - CKD of unknown cause after standard nephrological evaluation
  - End stage kidney disease (ESRD)
  
2. What is the most likely prognosis for your patient in the next five years (choose one)?
  - Remission of current active disease
  - Possible relapsing of kidney disease
  - Stable kidney function
  - Slow progression to ESRD
  - Rapid progression to ESRD
  
3. What is your treatment plan for this patient (choose all that apply)?
  - Conservative therapy only (e.g. renin angiotensin blockade, loded pressure control, diet)
  - SGLT2 inhibition
  - Immunosuppression with steroids
  - Immunosuppression with other agents (e.g. calcineurin inhibitors, MMF, etc.)
  - Refer for dialysis
  - Refer for transplantation
  - Refer for second opinion
  - Refer to other subspecialist (i.e. Ophthalmologist, Otolaryngologist,...)
  - for a clinical trial
  - Other (free text)
  
4. Are you planning a kidney biopsy (choose one)?
  - Yes, this patient has never had a biopsy
  - Yes, even though he had biopsies in the past
  - No, this patient has already had a diagnostic biopsy
  - No
  
5. Is transplant recommended?
  - Yes
  - No
  
6. Would you consider a living related donor for this patient?
  - Yes
  - No
  - I don't know



7. Does this patient have extra-renal health problems related or unrelated to the kidney disease?
  - Yes
  - No
  - I don't know
8. Have you ever referred this patient to other sub-specialists?
  - Yes
  - No
9. Do you expect the genetic result to impact the management of kidney disease recommended to your patient?
  - Yes
  - No
10. What led you to consider genetic testing? (Check all that apply)
  - Strong family history of kidney disease
  - Early onset of kidney disease
  - Exceptionally severe or atypical presentation
  - Extra-renal features (e.g. structural congenital anomalies; dysmorphic features)
  - Clinical features suggestive of a specific genetic diagnosis
  - Kidney disease of unknown etiology
  - A genetic result can alter treatment plan
  - I am offering genetic testing to all my patients

**Table S5: Post-Test Physician Questionnaire (One Month Follow-Up)**

1. What is your patient's clinical diagnosis? (free text)
2. What was this Renasight test result? (check all that apply)
  - Negative
  - Positive
  - Carrier
  - Variant of Uncertain Significance (VUS)
  - Unable to analyze
3. Did the Renasight result provide a genetic diagnosis for your patient's kidney disease?
  - Yes
  - Partially (free text, specify)
  - No
  - I don't know
4. If a VUS was identified, what did you recommend to your patient?
  - To disregard this result
  - To follow-up in a year to learn whether the variant interpretation changed
  - To undergo clinical tests to help interpret this variant
  - To consider it as diagnostic
  - To discuss cascade testing in family members with genetic counselor
  - N/A: no VUS variant was identified
  - Other (free text)
5. If a carrier variant reported, what did you recommend to your patient?
  - To disregard this result

- To follow-up in a year to learn whether the variant interpretation changed
  - To undergo additional genetic tests to help interpret this variant
  - To consider it as diagnostic
  - To discuss cascade testing in family members with genetic counselor
  - N/A: no carrier variant was reported
  - Other (free text)
6. If no genetic diagnosis was reported, did you recommend the following to your patient? (Check all that apply)
- To consider that his/her kidney disease is not genetic
  - To discuss the opportunity to undergo additional genetic testing with a genetic counselor
  - To undergo a clinical whole-exome sequencing testing
  - To recommend genetic counseling to other family members with kidney disease
  - N/A: a genetic diagnosis was reported
  - Other (free text)
7. After receiving the Renasight result, did you refer your patient to genetic counseling?
- Yes
  - No, he/she already talked with a genetic counselor about the result
  - No, I explained the result and do not see the need to refer to genetic counseling
8. Did the Renasight result impact your discussion about family planning with your patient?
- Yes
  - No, the result didn't impact prior discussions on family planning
  - No, I haven't discussed family planning with my patient
9. What is your treatment plan for this patient?
- Conservative therapy only (e.g. renin angiotensin blockade, lollod pressure control, diet)
  - SGLT2 inhibition
  - Immunosuppression with steroids
  - Immunosuppression with other agents (e.g. calcineurin inhibitors, MMF, etc.)
  - Refer for dialysis
  - Refer for transplantation
  - Refer for second opinion
  - Refer to other subspecialists (i.e. Ophthalmologist, Otolaryngologist,...)
  - Refer for a clinical trial
  - Other (free text)
10. Did the genetic result impact your decision to obtain a kidney biopsy?
- Yes, I ordered a biopsy because of the genetic result
  - Yes, I did not order a biopsy because of the genetic result
  - No, I ordered a biopsy independently of the genetic result
  - No, I did not order a biopsy independently of the genetic result
  - This patient already has had a biopsy
11. Did your treatment plan change because of the genetic results?
- Yes
  - No
12. What is the most likely prognosis for your patient in the next five years?
- Remission of current active disease

- Possible relapsing of kidney disease
- Stable kidney function
- Slow progression to ESRD
- Rapid progression to ESRD

13. Transplant recommended?

- Yes
- No

14. Are you considering a living related donor?

- Yes
- No

15. Does this patient have extra-renal health problems related or unrelated to the kidney disease?

- Yes
- No

16. Did you recommend genetic testing for family members?

- Yes
- No

17. Did the experience with this patient change your interest in genetic testing? (Check all that apply)

- Yes; I will discuss genetic testing with more patients
- Yes; I will refer my patients to genetic counseling more often
- Yes; I will order genetic testing more often
- Yes; I will order genetic testing less often
- No; it did not change my interest in referring my patients for genetic counseling
- No; it did not change my interest in ordering genetic testing for my patients

**Table S6: Patients with IFT140 loss-of-function variants**

| <b>Clinical Kidney Disease Categorization (pre-test)</b>     | <b>Gene</b>   | <b>Variant</b>                       |
|--------------------------------------------------------------|---------------|--------------------------------------|
| Cystic nephropathy                                           | <i>IFT140</i> | c.2399+1G>T (p.?)                    |
| CKD of unknown cause after standard nephrological evaluation | <i>IFT140</i> | c.3219C>A<br>(p.Tyr1073*)            |
| Cystic nephropathy                                           | <i>IFT140</i> | c.2399+1G>T (p.?)                    |
| Nephropathy associated with Hypertension                     | <i>IFT140</i> | c.1406_1430del<br>(p.Leu469Glnfs*11) |
| Cystic nephropathy                                           | <i>IFT140</i> | c.1010-1G>A (p.?)                    |
| Cystic nephropathy                                           | <i>IFT140</i> | c.1377G>A<br>(p.Trp459*)             |
| Cystic nephropathy                                           | <i>IFT140</i> | c.2980C>T<br>(p.Gln994*)             |
| Nephropathy associated with Diabetes Mellitus (DM)           | <i>IFT140</i> | c.2578-2A>G (p.?)                    |
| Cystic nephropathy                                           | <i>IFT140</i> | c.3160C>T<br>(p.Gln1054*)            |
| Cystic nephropathy                                           | <i>IFT140</i> | c.2399+1G>T (p.?)                    |

**Table S7: Patients with reclassification of VUS to P/LP positive genetic finding**

| <b>Clinical Kidney Disease Categorization (pre-test)</b> | <b>Gene</b>   | <b>Variant</b> |
|----------------------------------------------------------|---------------|----------------|
| cystic nephropathy                                       | <i>PKD2</i>   | c.1349G>A      |
| cystic nephropathy                                       | <i>PKD1</i>   | c.1543G>A      |
| cystic nephropathy                                       | <i>PKD1</i>   | c.1543G>A      |
| proteinuric disease suggestive of glomerulopathy         | <i>RRM2B</i>  | c.122G>A       |
| proteinuric disease suggestive of glomerulopathy         | <i>COL4A3</i> | C3546_3548dup  |

**Table S8: Cases with Multiple Positive Findings**

| <b>Genetic Findings</b>                            | <b>Pre-test Clinical Diagnosis</b>                           | <b>Diagnostic Impact Category</b> |
|----------------------------------------------------|--------------------------------------------------------------|-----------------------------------|
| <b><i>APOL1</i> (n=10)</b>                         |                                                              |                                   |
| <i>ABCC8</i> *<br><i>APOL1</i>                     | Early onset, severe or familial hypertension                 | At risk                           |
| <i>COL4A4</i> *<br><i>APOL1</i>                    | Proteinuric disease suggestive of a primary glomerulopathy   | diagnose                          |
| <i>COL4A3</i> *<br><i>COL4A4</i> *<br><i>APOL1</i> | Proteinuric disease suggestive of a primary glomerulopathy   | diagnose                          |
| <i>PKD1</i> *<br><i>APOL1</i><br><i>CYP17A1</i>    | Cystic nephropathy                                           | confirm                           |
| <i>HBB</i> *<br><i>APOL1</i>                       | CKD of unknown cause after standard nephrological evaluation | diagnose                          |
| <i>HBB</i> *<br><i>APOL1</i>                       | Proteinuric disease suggestive of a primary glomerulopathy   | confirm                           |
| <i>APOL1</i> *<br><i>MC4R</i>                      | ESKD                                                         | diagnose, partial                 |
| <i>APOL1</i> *<br><i>SLC3A1</i><br><i>TTR</i>      | Nephropathy associated with Hypertension                     | diagnose, partial                 |
| <i>SMAD9</i> *<br><i>APOL1</i>                     | Nephropathy associated with Hypertension                     | diagnose                          |
| <i>APOL1</i> *<br><i>TTR</i>                       | Nephropathy associated with Hypertension                     | diagnose, partial                 |
| <b>Non-<i>APOL1</i> (n=11)</b>                     |                                                              |                                   |
| <i>CASR</i> *<br><i>SALL1</i>                      | CKD of unknown cause after standard nephrological evaluation | diagnose                          |

|                 |                                                |          |
|-----------------|------------------------------------------------|----------|
| <i>CFH*</i>     | Nephropathy associated with                    | at risk  |
| <i>TRPC6*</i>   | Hypertension                                   |          |
| <i>COL4A3</i>   |                                                |          |
| <i>PKD1*</i>    | Cystic nephropathy                             | confirm  |
| <i>COL4A3</i>   |                                                |          |
| <i>SLC12A3*</i> | Electrolyte and/or acid base disorder          | diagnose |
| <i>COL4A4*</i>  |                                                |          |
| <i>COL4A5*</i>  | Early onset, severe or familial hypertension   | diagnose |
| <i>COL4A4*</i>  |                                                |          |
| <i>KANSL1</i>   | Tubulointerstitial disease of unknown etiology | diagnose |
| <i>COL4A4</i>   |                                                |          |
| <i>PKD1*</i>    | Cystic nephropathy                             | confirm  |
| <i>PKD1*</i>    |                                                |          |
| <i>SLC7A9</i>   | Cystic nephropathy                             | confirm  |
| <i>PKD1*</i>    |                                                |          |
| <i>TRPC6</i>    | Cystic nephropathy                             | confirm  |
| <i>PKD1*</i>    |                                                |          |
| <i>TTR</i>      | End stage kidney disease (ESRD)                | confirm  |
| <i>PKD2</i>     |                                                |          |
| <i>SLC4A1</i>   | Electrolyte and/or acid base disorder          | diagnose |

\*gene with positive finding with the greatest impact on classification

**Table S9: Frequency of positive gene findings according to pre-test clinical disease category**

| Gene           | Total Gene Findings<br>N=362 | Cystic nephropathy<br>N=136 | Proteinuric glomerulopathy<br>N=44 | Nephropathy with Hypertension<br>N=42 | End stage kidney disease<br>N=30 | CKD of unknown etiology<br>N=26 | Nephropathy with Diabetes<br>N=18 | Hematuria<br>N=15 | Electrolyte/acid base disorder<br>N=13 | Congenital nephropathy<br>N=10 | Familial hypertension<br>N=7 | Tubulointerstitia I disease<br>N=7 | Nephrolithiasis<br>N=5 | Not Reported<br>N=9 |
|----------------|------------------------------|-----------------------------|------------------------------------|---------------------------------------|----------------------------------|---------------------------------|-----------------------------------|-------------------|----------------------------------------|--------------------------------|------------------------------|------------------------------------|------------------------|---------------------|
| <i>PKD1</i>    | 95 (26.2)                    | 89 (65.4)                   | 0 (0.0)                            | 1 (2.4)                               | 1 (3.3)                          | 0 (0.0)                         | 1 (5.6)                           | 0 (0.0)           | 0 (0.0)                                | 1 (10.0)                       | 0 (0.0)                      | 0 (0.0)                            | 0 (0.0)                | 2 (22.2)            |
| <i>APOL1</i>   | 61 (16.9)                    | 1 (0.7)                     | 20 (45.5)                          | 13 (31.0)                             | 10 (33.3)                        | 6 (23.1)                        | 4 (22.2)                          | 0 (0.0)           | 0 (0.0)                                | 0 (0.0)                        | 4 (57.1)                     | 0 (0.0)                            | 1 (20.0)               | 2 (22.2)            |
| <i>PKD2</i>    | 32 (8.8)                     | 27 (19.9)                   | 0 (0.0)                            | 1 (2.4)                               | 2 (6.7)                          | 0 (0.0)                         | 0 (0.0)                           | 0 (0.0)           | 1 (7.7)                                | 0 (0.0)                        | 0 (0.0)                      | 0 (0.0)                            | 0 (0.0)                | 1 (11.1)            |
| <i>COL4A4</i>  | 26 (7.2)                     | 4 (2.9)                     | 7 (15.9)                           | 3 (7.1)                               | 2 (6.7)                          | 1 (3.8)                         | 1 (5.6)                           | 5 (33.3)          | 0 (0.0)                                | 0 (0.0)                        | 1 (14.3)                     | 1 (14.3)                           | 1 (20.0)               | 0 (0.0)             |
| <i>COL4A3</i>  | 21 (5.8)                     | 3 (2.2)                     | 3 (6.8)                            | 2 (4.8)                               | 3 (10.0)                         | 1 (3.8)                         | 2 (11.1)                          | 3 (20.0)          | 1 (7.7)                                | 1 (10.0)                       | 0 (0.0)                      | 1 (14.3)                           | 1 (20.0)               | 0 (0.0)             |
| <i>COL4A5</i>  | 18 (5.0)                     | 1 (0.7)                     | 4 (9.1)                            | 0 (0.0)                               | 0 (0.0)                          | 2 (7.7)                         | 0 (0.0)                           | 4 (26.7)          | 0 (0.0)                                | 5 (50.0)                       | 1 (14.3)                     | 0 (0.0)                            | 0 (0.0)                | 1 (11.1)            |
| <i>SLC7A9</i>  | 9 (2.5)                      | 3 (2.2)                     | 0 (0.0)                            | 0 (0.0)                               | 2 (6.7)                          | 2 (7.7)                         | 1 (5.6)                           | 0 (0.0)           | 0 (0.0)                                | 0 (0.0)                        | 0 (0.0)                      | 0 (0.0)                            | 0 (0.0)                | 1 (11.1)            |
| <i>TTR</i>     | 8 (2.2)                      | 0 (0.0)                     | 0 (0.0)                            | 2 (4.8)                               | 4 (13.3)                         | 0 (0.0)                         | 2 (11.1)                          | 0 (0.0)           | 0 (0.0)                                | 0 (0.0)                        | 0 (0.0)                      | 0 (0.0)                            | 0 (0.0)                | 0 (0.0)             |
| <i>ABCC8</i>   | 5 (1.4)                      | 1 (0.7)                     | 1 (2.3)                            | 0 (0.0)                               | 0 (0.0)                          | 0 (0.0)                         | 1 (5.6)                           | 0 (0.0)           | 0 (0.0)                                | 0 (0.0)                        | 1 (14.3)                     | 0 (0.0)                            | 0 (0.0)                | 1 (11.1)            |
| <i>CLCNKB</i>  | 5 (1.4)                      | 0 (0.0)                     | 0 (0.0)                            | 0 (0.0)                               | 0 (0.0)                          | 1 (3.8)                         | 0 (0.0)                           | 0 (0.0)           | 3 (23.1)                               | 0 (0.0)                        | 0 (0.0)                      | 1 (14.3)                           | 0 (0.0)                | 0 (0.0)             |
| <i>SLC12A3</i> | 5 (1.4)                      | 0 (0.0)                     | 0 (0.0)                            | 0 (0.0)                               | 0 (0.0)                          | 0 (0.0)                         | 0 (0.0)                           | 0 (0.0)           | 4 (30.8)                               | 0 (0.0)                        | 0 (0.0)                      | 1 (14.3)                           | 0 (0.0)                | 0 (0.0)             |
| <i>UMOD</i>    | 5 (1.4)                      | 0 (0.0)                     | 0 (0.0)                            | 1 (2.4)                               | 0 (0.0)                          | 4 (15.4)                        | 0 (0.0)                           | 0 (0.0)           | 0 (0.0)                                | 0 (0.0)                        | 0 (0.0)                      | 0 (0.0)                            | 0 (0.0)                | 0 (0.0)             |
| <i>HBB</i>     | 4 (1.1)                      | 0 (0.0)                     | 3 (6.8)                            | 0 (0.0)                               | 0 (0.0)                          | 1 (3.8)                         | 0 (0.0)                           | 0 (0.0)           | 0 (0.0)                                | 0 (0.0)                        | 0 (0.0)                      | 0 (0.0)                            | 0 (0.0)                | 0 (0.0)             |
| <i>HNF1A</i>   | 4 (1.1)                      | 0 (0.0)                     | 0 (0.0)                            | 2 (4.8)                               | 1 (3.3)                          | 0 (0.0)                         | 1 (5.6)                           | 0 (0.0)           | 0 (0.0)                                | 0 (0.0)                        | 0 (0.0)                      | 0 (0.0)                            | 0 (0.0)                | 0 (0.0)             |
| <i>SLC3A1</i>  | 4 (1.1)                      | 0 (0.0)                     | 0 (0.0)                            | 2 (4.8)                               | 0 (0.0)                          | 0 (0.0)                         | 0 (0.0)                           | 0 (0.0)           | 0 (0.0)                                | 1 (10.0)                       | 0 (0.0)                      | 0 (0.0)                            | 1 (20.0)               | 0 (0.0)             |
| <i>CASR</i>    | 3 (0.8)                      | 0 (0.0)                     | 0 (0.0)                            | 1 (2.4)                               | 0 (0.0)                          | 1 (3.8)                         | 0 (0.0)                           | 0 (0.0)           | 1 (7.7)                                | 0 (0.0)                        | 0 (0.0)                      | 0 (0.0)                            | 0 (0.0)                | 0 (0.0)             |
| <i>CFH</i>     | 3 (0.8)                      | 0 (0.0)                     | 0 (0.0)                            | 2 (4.8)                               | 1 (3.3)                          | 0 (0.0)                         | 0 (0.0)                           | 0 (0.0)           | 0 (0.0)                                | 0 (0.0)                        | 0 (0.0)                      | 0 (0.0)                            | 0 (0.0)                | 0 (0.0)             |
| <i>COL4A1</i>  | 3 (0.8)                      | 0 (0.0)                     | 0 (0.0)                            | 1 (2.4)                               | 0 (0.0)                          | 0 (0.0)                         | 0 (0.0)                           | 1 (6.7)           | 1 (7.7)                                | 0 (0.0)                        | 0 (0.0)                      | 0 (0.0)                            | 0 (0.0)                | 0 (0.0)             |
| <i>NPHP1</i>   | 3 (0.8)                      | 0 (0.0)                     | 0 (0.0)                            | 1 (2.4)                               | 0 (0.0)                          | 1 (3.8)                         | 0 (0.0)                           | 0 (0.0)           | 0 (0.0)                                | 0 (0.0)                        | 0 (0.0)                      | 1 (14.3)                           | 0 (0.0)                | 0 (0.0)             |
| <i>SLC4A1</i>  | 3 (0.8)                      | 0 (0.0)                     | 0 (0.0)                            | 0 (0.0)                               | 1 (3.3)                          | 0 (0.0)                         | 0 (0.0)                           | 0 (0.0)           | 2 (15.4)                               | 0 (0.0)                        | 0 (0.0)                      | 0 (0.0)                            | 0 (0.0)                | 0 (0.0)             |
| <i>ALG9</i>    | 2 (0.6)                      | 1 (0.7)                     | 0 (0.0)                            | 0 (0.0)                               | 0 (0.0)                          | 0 (0.0)                         | 0 (0.0)                           | 1 (6.7)           | 0 (0.0)                                | 0 (0.0)                        | 0 (0.0)                      | 0 (0.0)                            | 0 (0.0)                | 0 (0.0)             |
| <i>BMPR2</i>   | 2 (0.6)                      | 0 (0.0)                     | 0 (0.0)                            | 2 (4.8)                               | 0 (0.0)                          | 0 (0.0)                         | 0 (0.0)                           | 0 (0.0)           | 0 (0.0)                                | 0 (0.0)                        | 0 (0.0)                      | 0 (0.0)                            | 0 (0.0)                | 0 (0.0)             |
| <i>CFI</i>     | 2 (0.6)                      | 0 (0.0)                     | 1 (2.3)                            | 1 (2.4)                               | 0 (0.0)                          | 0 (0.0)                         | 0 (0.0)                           | 0 (0.0)           | 0 (0.0)                                | 0 (0.0)                        | 0 (0.0)                      | 0 (0.0)                            | 0 (0.0)                | 0 (0.0)             |
| <i>CUBN</i>    | 2 (0.6)                      | 0 (0.0)                     | 0 (0.0)                            | 0 (0.0)                               | 0 (0.0)                          | 1 (3.8)                         | 0 (0.0)                           | 1 (6.7)           | 0 (0.0)                                | 0 (0.0)                        | 0 (0.0)                      | 0 (0.0)                            | 0 (0.0)                | 0 (0.0)             |
| <i>HNF1B</i>   | 2 (0.6)                      | 0 (0.0)                     | 0 (0.0)                            | 0 (0.0)                               | 0 (0.0)                          | 0 (0.0)                         | 1 (5.6)                           | 0 (0.0)           | 0 (0.0)                                | 1 (10.0)                       | 0 (0.0)                      | 0 (0.0)                            | 0 (0.0)                | 0 (0.0)             |
| <i>MC4R</i>    | 2 (0.6)                      | 0 (0.0)                     | 0 (0.0)                            | 1 (2.4)                               | 1 (3.3)                          | 0 (0.0)                         | 0 (0.0)                           | 0 (0.0)           | 0 (0.0)                                | 0 (0.0)                        | 0 (0.0)                      | 0 (0.0)                            | 0 (0.0)                | 0 (0.0)             |
| <i>OFD1</i>    | 2 (0.6)                      | 2 (1.5)                     | 0 (0.0)                            | 0 (0.0)                               | 0 (0.0)                          | 0 (0.0)                         | 0 (0.0)                           | 0 (0.0)           | 0 (0.0)                                | 0 (0.0)                        | 0 (0.0)                      | 0 (0.0)                            | 0 (0.0)                | 0 (0.0)             |

|                 | Total Gene Findings | Cystic nephropathy | Proteinuric glomerulopathy | Nephropathy with Hypertension | End stage kidney disease | CKD of unknown etiology | Nephropathy with Diabetes | Hematuria | Electrolyte/acid base disorder | Congenital nephropathy | Familial hypertension | Tubulointerstitia l disease | Nephrolithiasis | Not Reported |
|-----------------|---------------------|--------------------|----------------------------|-------------------------------|--------------------------|-------------------------|---------------------------|-----------|--------------------------------|------------------------|-----------------------|-----------------------------|-----------------|--------------|
| <i>SALL1</i>    | 2 (0.6)             | 0 (0.0)            | 0 (0.0)                    | 0 (0.0)                       | 0 (0.0)                  | 2 (7.7)                 | 0 (0.0)                   | 0 (0.0)   | 0 (0.0)                        | 0 (0.0)                | 0 (0.0)               | 0 (0.0)                     | 0 (0.0)         | 0 (0.0)      |
| <i>SLC2A9</i>   | 2 (0.6)             | 0 (0.0)            | 0 (0.0)                    | 1 (2.4)                       | 0 (0.0)                  | 0 (0.0)                 | 0 (0.0)                   | 0 (0.0)   | 0 (0.0)                        | 0 (0.0)                | 0 (0.0)               | 0 (0.0)                     | 0 (0.0)         | 1 (11.1)     |
| <i>TRPC6</i>    | 2 (0.6)             | 1 (0.7)            | 0 (0.0)                    | 1 (2.4)                       | 0 (0.0)                  | 0 (0.0)                 | 0 (0.0)                   | 0 (0.0)   | 0 (0.0)                        | 0 (0.0)                | 0 (0.0)               | 0 (0.0)                     | 0 (0.0)         | 0 (0.0)      |
| <i>WT1</i>      | 2 (0.6)             | 0 (0.0)            | 1 (2.3)                    | 0 (0.0)                       | 0 (0.0)                  | 1 (3.8)                 | 0 (0.0)                   | 0 (0.0)   | 0 (0.0)                        | 0 (0.0)                | 0 (0.0)               | 0 (0.0)                     | 0 (0.0)         | 0 (0.0)      |
| <i>ATP7B</i>    | 1 (0.3)             | 0 (0.0)            | 0 (0.0)                    | 0 (0.0)                       | 0 (0.0)                  | 1 (3.8)                 | 0 (0.0)                   | 0 (0.0)   | 0 (0.0)                        | 0 (0.0)                | 0 (0.0)               | 0 (0.0)                     | 0 (0.0)         | 0 (0.0)      |
| <i>CD2AP</i>    | 1 (0.3)             | 0 (0.0)            | 0 (0.0)                    | 0 (0.0)                       | 0 (0.0)                  | 0 (0.0)                 | 1 (5.6)                   | 0 (0.0)   | 0 (0.0)                        | 0 (0.0)                | 0 (0.0)               | 0 (0.0)                     | 0 (0.0)         | 0 (0.0)      |
| <i>CLCN5</i>    | 1 (0.3)             | 0 (0.0)            | 0 (0.0)                    | 0 (0.0)                       | 1 (3.3)                  | 0 (0.0)                 | 0 (0.0)                   | 0 (0.0)   | 0 (0.0)                        | 0 (0.0)                | 0 (0.0)               | 0 (0.0)                     | 0 (0.0)         | 0 (0.0)      |
| <i>CYP17A1</i>  | 1 (0.3)             | 1 (0.7)            | 0 (0.0)                    | 0 (0.0)                       | 0 (0.0)                  | 0 (0.0)                 | 0 (0.0)                   | 0 (0.0)   | 0 (0.0)                        | 0 (0.0)                | 0 (0.0)               | 0 (0.0)                     | 0 (0.0)         | 0 (0.0)      |
| <i>DHCR7</i>    | 1 (0.3)             | 1 (0.7)            | 0 (0.0)                    | 0 (0.0)                       | 0 (0.0)                  | 0 (0.0)                 | 0 (0.0)                   | 0 (0.0)   | 0 (0.0)                        | 0 (0.0)                | 0 (0.0)               | 0 (0.0)                     | 0 (0.0)         | 0 (0.0)      |
| <i>FAN1</i>     | 1 (0.3)             | 0 (0.0)            | 0 (0.0)                    | 0 (0.0)                       | 0 (0.0)                  | 0 (0.0)                 | 0 (0.0)                   | 0 (0.0)   | 0 (0.0)                        | 0 (0.0)                | 0 (0.0)               | 1 (14.3)                    | 0 (0.0)         | 0 (0.0)      |
| <i>FLCN</i>     | 1 (0.3)             | 0 (0.0)            | 0 (0.0)                    | 1 (2.4)                       | 0 (0.0)                  | 0 (0.0)                 | 0 (0.0)                   | 0 (0.0)   | 0 (0.0)                        | 0 (0.0)                | 0 (0.0)               | 0 (0.0)                     | 0 (0.0)         | 0 (0.0)      |
| <i>GNAS</i>     | 1 (0.3)             | 0 (0.0)            | 0 (0.0)                    | 0 (0.0)                       | 0 (0.0)                  | 1 (3.8)                 | 0 (0.0)                   | 0 (0.0)   | 0 (0.0)                        | 0 (0.0)                | 0 (0.0)               | 0 (0.0)                     | 0 (0.0)         | 0 (0.0)      |
| <i>KANSL1</i>   | 1 (0.3)             | 0 (0.0)            | 0 (0.0)                    | 0 (0.0)                       | 0 (0.0)                  | 0 (0.0)                 | 0 (0.0)                   | 0 (0.0)   | 0 (0.0)                        | 0 (0.0)                | 0 (0.0)               | 1 (14.3)                    | 0 (0.0)         | 0 (0.0)      |
| <i>KLHL3</i>    | 1 (0.3)             | 0 (0.0)            | 0 (0.0)                    | 0 (0.0)                       | 0 (0.0)                  | 0 (0.0)                 | 0 (0.0)                   | 0 (0.0)   | 0 (0.0)                        | 0 (0.0)                | 0 (0.0)               | 0 (0.0)                     | 1 (20.0)        | 0 (0.0)      |
| <i>LMNA</i>     | 1 (0.3)             | 0 (0.0)            | 0 (0.0)                    | 0 (0.0)                       | 0 (0.0)                  | 0 (0.0)                 | 1 (5.6)                   | 0 (0.0)   | 0 (0.0)                        | 0 (0.0)                | 0 (0.0)               | 0 (0.0)                     | 0 (0.0)         | 0 (0.0)      |
| <i>LRP5</i>     | 1 (0.3)             | 0 (0.0)            | 0 (0.0)                    | 1 (2.4)                       | 0 (0.0)                  | 0 (0.0)                 | 0 (0.0)                   | 0 (0.0)   | 0 (0.0)                        | 0 (0.0)                | 0 (0.0)               | 0 (0.0)                     | 0 (0.0)         | 0 (0.0)      |
| <i>MAFB</i>     | 1 (0.3)             | 0 (0.0)            | 0 (0.0)                    | 0 (0.0)                       | 1 (3.3)                  | 0 (0.0)                 | 0 (0.0)                   | 0 (0.0)   | 0 (0.0)                        | 0 (0.0)                | 0 (0.0)               | 0 (0.0)                     | 0 (0.0)         | 0 (0.0)      |
| <i>NPHS2</i>    | 1 (0.3)             | 0 (0.0)            | 1 (2.3)                    | 0 (0.0)                       | 0 (0.0)                  | 0 (0.0)                 | 0 (0.0)                   | 0 (0.0)   | 0 (0.0)                        | 0 (0.0)                | 0 (0.0)               | 0 (0.0)                     | 0 (0.0)         | 0 (0.0)      |
| <i>OCRL</i>     | 1 (0.3)             | 0 (0.0)            | 0 (0.0)                    | 0 (0.0)                       | 0 (0.0)                  | 0 (0.0)                 | 1 (5.6)                   | 0 (0.0)   | 0 (0.0)                        | 0 (0.0)                | 0 (0.0)               | 0 (0.0)                     | 0 (0.0)         | 0 (0.0)      |
| <i>PAX2</i>     | 1 (0.3)             | 0 (0.0)            | 0 (0.0)                    | 0 (0.0)                       | 0 (0.0)                  | 0 (0.0)                 | 0 (0.0)                   | 0 (0.0)   | 0 (0.0)                        | 1 (10.0)               | 0 (0.0)               | 0 (0.0)                     | 0 (0.0)         | 0 (0.0)      |
| <i>PRKCSH</i>   | 1 (0.3)             | 1 (0.7)            | 0 (0.0)                    | 0 (0.0)                       | 0 (0.0)                  | 0 (0.0)                 | 0 (0.0)                   | 0 (0.0)   | 0 (0.0)                        | 0 (0.0)                | 0 (0.0)               | 0 (0.0)                     | 0 (0.0)         | 0 (0.0)      |
| <i>PROKR2</i>   | 1 (0.3)             | 0 (0.0)            | 0 (0.0)                    | 1 (2.4)                       | 0 (0.0)                  | 0 (0.0)                 | 0 (0.0)                   | 0 (0.0)   | 0 (0.0)                        | 0 (0.0)                | 0 (0.0)               | 0 (0.0)                     | 0 (0.0)         | 0 (0.0)      |
| <i>ROBO2</i>    | 1 (0.3)             | 0 (0.0)            | 1 (2.3)                    | 0 (0.0)                       | 0 (0.0)                  | 0 (0.0)                 | 0 (0.0)                   | 0 (0.0)   | 0 (0.0)                        | 0 (0.0)                | 0 (0.0)               | 0 (0.0)                     | 0 (0.0)         | 0 (0.0)      |
| <i>SCNN1B</i>   | 1 (0.3)             | 0 (0.0)            | 0 (0.0)                    | 0 (0.0)                       | 0 (0.0)                  | 0 (0.0)                 | 1 (5.6)                   | 0 (0.0)   | 0 (0.0)                        | 0 (0.0)                | 0 (0.0)               | 0 (0.0)                     | 0 (0.0)         | 0 (0.0)      |
| <i>SMAD9</i>    | 1 (0.3)             | 0 (0.0)            | 0 (0.0)                    | 1 (2.4)                       | 0 (0.0)                  | 0 (0.0)                 | 0 (0.0)                   | 0 (0.0)   | 0 (0.0)                        | 0 (0.0)                | 0 (0.0)               | 0 (0.0)                     | 0 (0.0)         | 0 (0.0)      |
| <i>SMARCAL1</i> | 1 (0.3)             | 0 (0.0)            | 1 (2.3)                    | 0 (0.0)                       | 0 (0.0)                  | 0 (0.0)                 | 0 (0.0)                   | 0 (0.0)   | 0 (0.0)                        | 0 (0.0)                | 0 (0.0)               | 0 (0.0)                     | 0 (0.0)         | 0 (0.0)      |
| <i>WAS</i>      | 1 (0.3)             | 0 (0.0)            | 1 (2.3)                    | 0 (0.0)                       | 0 (0.0)                  | 0 (0.0)                 | 0 (0.0)                   | 0 (0.0)   | 0 (0.0)                        | 0 (0.0)                | 0 (0.0)               | 0 (0.0)                     | 0 (0.0)         | 0 (0.0)      |



**Table S10: Patients with Reclassified Diagnoses**

| <b>Gene/ Associated Condition</b>                                                        | <b>Pre Test Clinical Information</b>                                                                 | <b>Rationale for Reclassification</b>                                    |
|------------------------------------------------------------------------------------------|------------------------------------------------------------------------------------------------------|--------------------------------------------------------------------------|
| <b><i>PRKCSH</i></b><br>Polycystic Liver Disease 1                                       | Cystic nephropathy; ADPKD                                                                            | ADPLD                                                                    |
| <b><i>COL4A3</i></b><br>Alport Syndrome                                                  | Nephropathy associated with Diabetes Mellitus (DM); Proteinuria, hematuria, hypertension, DMT2, CKD3 | Renal features can be explained by Alport Syndrome                       |
| <b><i>COL4A4</i></b><br>Alport Syndrome                                                  | Nephropathy associated with Diabetes Mellitus (DM); Moderate hematuria, proteinuria, DMT2            | Renal features can be explained by Alport Syndrome                       |
| <b><i>COL4A3</i></b><br>Alport Syndrome                                                  | Nephropathy associated with Hypertension; proteinuria, hypertension                                  | Renal features can be explained by Alport Syndrome                       |
| <b><i>HNF1A</i></b><br>Maturity-Onset Diabetes of the Young                              | Nephropathy associated with Hypertension; Diabetes (diagnosed at age 8)                              | Diabetes etiology in genetic finding                                     |
| <b><i>HNF1A</i></b><br>Maturity-Onset Diabetes of the Young                              | Nephropathy associated with Hypertension; Diabetes (diagnosed at age 29)                             | Diabetes etiology in genetic finding                                     |
| <b><i>NPHP1</i></b><br>Juvenile nephronophthisis/ Senior-Loken syndrome/Joubert syndrome | Nephropathy associated with Hypertension; Hypertension onset at age 12                               | Hypertension and echogenic kidneys are features of NPHP1-related disease |
| <b><i>UMOD</i></b><br>Autosomal Dominant Tubulointerstitial Kidney Disease (ADTKD)       | Nephropathy associated with Hypertension, small right kidney, hyperlipidemia, hypertension, CKD4     | Clinical features can be explained by UMOD-related ADTKD                 |

**Table S11: Patients for whom biopsy was not pursued based on genetic test results**

| <b>Disease Category</b> | <b>Genetic Diagnosis</b> | <b>Diagnostic Impact</b> | <b>Clinical Data</b>                                                                                         |
|-------------------------|--------------------------|--------------------------|--------------------------------------------------------------------------------------------------------------|
| Nephropathy with HTN    | <i>APOL1</i>             | At risk                  | 47yo African-American male, proteinuria, fam hx HTN; SCr 1.9mg/dl                                            |
| Nephropathy with HTN    | <i>APOL1</i>             | at risk                  | 62yo African-American female with HTN, strong fam hx kidney disease; SCr 1.02mg/dl; bilateral solitary cysts |
| Nephropathy with HTN    | <i>NPHP1</i>             | reclassify               | 33yo White male with pediatric onset HTN; SCr 3.4mg/dl                                                       |
| Nephropathy with HTN    | <i>APOL1/SLC3A1/TTR</i>  | diagnose, partial        | 48yo male with HTN                                                                                           |
| Nephropathy with DM     | <i>APOL1</i>             | At risk                  | 40yo African-American male with DM x6yrs, eGFR 58ml/min; proteinuria, HTN, obesity; HbA1c 12.3%              |
| Hematuria               | <i>COL4A4</i>            | diagnose                 | 70yo White male, microscopic hematuria, SCr 1.39mg/dl                                                        |
| Hematuria               | <i>COL4A4</i>            | diagnose                 | 57yo White female with microscopic hematuria, proteinuria, hypertension                                      |
| Hematuria               | <i>COL4A5</i>            | diagnose                 | 54yo White female with microscopic hematuria, HTN, eGFR 78ml/min                                             |
| Hematuria               | <i>COL5A5</i>            | diagnose                 | 22yo white male                                                                                              |
| congenital nephropathy  | <i>COL4A5</i>            | diagnose                 | 55yo White female with hematuria, proteinuria                                                                |

**Table S12: Patients with Positive Genetic Findings that were Biopsied Prior to Genetic Testing**

| <b>Clinical diagnosis</b>                                  | <b>Genetic Diagnosis</b> | <b>Diagnostic Impact</b>  | <b>Histologic finding</b>                                                                                                              |
|------------------------------------------------------------|--------------------------|---------------------------|----------------------------------------------------------------------------------------------------------------------------------------|
| Nephropathy associated with Hypertension                   | <i>APOL1</i>             | Diagnose, partial         | Limited kidney biopsy composed predominantly of medulla with extensive chronic changes.                                                |
| Nephropathy associated with Hypertension                   | <i>APOL1</i>             | Diagnose, partial         | DNP                                                                                                                                    |
| Nephropathy associated with Hypertension                   | <i>APOL1</i>             | At risk molecular finding | Acute tubular injury, diffuse mild arterionephrosclerosis                                                                              |
| Proteinuric disease suggestive of a primary glomerulopathy | <i>APOL1</i>             | At risk molecular finding | DNP                                                                                                                                    |
| Proteinuric disease suggestive of a primary glomerulopathy | <i>APOL1</i>             | At risk molecular finding | Membranous nephropathy                                                                                                                 |
| Proteinuric disease suggestive of a primary glomerulopathy | <i>APOL1</i>             | At risk molecular finding | Diffuse segmental and global sclerosing glomerulopathy, moderate, with glomerulomegaly                                                 |
| Proteinuric disease suggestive of a primary glomerulopathy | <i>APOL1</i>             | At risk molecular finding | Membranous nephropathy                                                                                                                 |
| Proteinuric disease suggestive of a primary glomerulopathy | <i>APOL1</i>             | At risk molecular finding | Diffuse mesangial and mild focal segmental membranoproliferative and sclerosing glomerulonephritis with monoclonal IgG3-kappa deposits |

|                                                            |                                |                           |                                                                                                                                           |
|------------------------------------------------------------|--------------------------------|---------------------------|-------------------------------------------------------------------------------------------------------------------------------------------|
| Proteinuric disease suggestive of a primary glomerulopathy | <i>APOL1</i>                   | At risk molecular finding | Chronic thrombotic microangiopathy, arteriosclerosis                                                                                      |
| Proteinuric disease suggestive of a primary glomerulopathy | <i>APOL1</i>                   | Diagnose, partial         | DNP                                                                                                                                       |
| Proteinuric disease suggestive of a primary glomerulopathy | <i>APOL1</i>                   | Diagnose, partial         | Collapsing FSGS                                                                                                                           |
| Proteinuric disease suggestive of a primary glomerulopathy | <i>APOL1</i>                   | Diagnose, partial         | FSGS                                                                                                                                      |
| Proteinuric disease suggestive of a primary glomerulopathy | <i>APOL1</i>                   | Diagnose, partial         | FS/FG mild glomerulosclerosis with glomerulomegaly and focal collapsing features; moderately severe arteriolosclerosis                    |
| Proteinuric disease suggestive of a primary glomerulopathy | <i>APOL1</i>                   | Diagnose, partial         | FSGS                                                                                                                                      |
| Proteinuric disease suggestive of a primary glomerulopathy | <i>APOL1</i>                   | Diagnose, partial         | Focal segmental and global sclerosing glomerulopathy with mesangial electron dense deposits<br>Arterio- and arteriolosclerosis, moderate. |
| Proteinuric disease suggestive of a primary glomerulopathy | <i>APOL1</i>                   | Diagnose, partial         | FSGS                                                                                                                                      |
| Proteinuric disease suggestive of a primary glomerulopathy | <i>ABCC8</i>                   | At risk finding           | FSGS                                                                                                                                      |
| Proteinuric disease suggestive of a                        | <i>APOL1</i><br><i>COL4A3*</i> | Diagnose                  | DNP                                                                                                                                       |

|                                                            |                                |                           |                                                                                                                                                                                                                                                                       |
|------------------------------------------------------------|--------------------------------|---------------------------|-----------------------------------------------------------------------------------------------------------------------------------------------------------------------------------------------------------------------------------------------------------------------|
| primary glomerulopathy                                     | <i>COL4A4*</i>                 |                           |                                                                                                                                                                                                                                                                       |
| Proteinuric disease suggestive of a primary glomerulopathy | <i>APOL1</i><br><i>COL4A4*</i> | Diagnose                  | DNP                                                                                                                                                                                                                                                                   |
| Proteinuric disease suggestive of a primary glomerulopathy | <i>APOL1</i><br><i>HBB*</i>    | Confirm                   | DNP                                                                                                                                                                                                                                                                   |
| Proteinuric disease suggestive of a primary glomerulopathy | <i>CFI</i>                     | At risk molecular finding | DNP                                                                                                                                                                                                                                                                   |
| Proteinuric disease suggestive of a primary glomerulopathy | <i>COL4A3</i>                  | Diagnose, partial         | DNP                                                                                                                                                                                                                                                                   |
| Proteinuric disease suggestive of a primary glomerulopathy | <i>COL4A3</i>                  | Diagnose, partial         | DNP                                                                                                                                                                                                                                                                   |
| Proteinuric disease suggestive of a primary glomerulopathy | <i>COL4A4</i>                  | Diagnose, partial         | IgAN                                                                                                                                                                                                                                                                  |
| Proteinuric disease suggestive of a primary glomerulopathy | <i>COL4A4</i>                  | Diagnose                  | Focal mesangial proliferative glomerulonephritis, consistent with IgA nephropathy, with mild glomerulomegaly, segmental GBM thinning, and focal GBM textural irregularities. Tubular atrophy and interstitial fibrosis, mild, with scattered interstitial foam cells. |
| Hematuria                                                  | <i>COL4A4</i>                  | Diagnose                  | Thin basement membrane nephropathy                                                                                                                                                                                                                                    |
| Proteinuric disease suggestive of a primary glomerulopathy | <i>COL4A5</i>                  | Diagnose                  | FSGS, mild mesangial immune complex deposition                                                                                                                                                                                                                        |

|                                                            |                                |                           |                                                                                                                                      |
|------------------------------------------------------------|--------------------------------|---------------------------|--------------------------------------------------------------------------------------------------------------------------------------|
| Proteinuric disease suggestive of a primary glomerulopathy | <i>COL4A5</i>                  | Diagnose                  | irregular GBM, focal glomerular fibrinoid necrosis, FSGS                                                                             |
| Congenital Nephropathy                                     | <i>COL4A5</i>                  | Diagnose                  | DNP                                                                                                                                  |
| Proteinuric disease suggestive of a primary glomerulopathy | <i>HBB</i>                     | Diagnose                  | Membranous glomerulopathy, stage 2-3, with segmental sclerosing features. Tubular atrophy & interstitial fibrosis, mild to moderate. |
| Proteinuric disease suggestive of a primary glomerulopathy | <i>NPHS2</i>                   | Diagnose                  | FSGS NOS but with thin GBMs noted on EM (mean 174.7 nm), raising suspicion for a type IV collagenopathy.                             |
| Proteinuric disease suggestive of a primary glomerulopathy | <i>ROBO2</i>                   | At risk molecular finding | Membranous nephropathy                                                                                                               |
| Proteinuric disease suggestive of a primary glomerulopathy | <i>WAS</i>                     | Diagnose                  | IgAN                                                                                                                                 |
| Hematuria                                                  | <i>CUBN</i>                    | Diagnose                  | normal size, normocellular mesangium, GBMs appear thin and delicate                                                                  |
| Tubulointerstitial disease                                 | <i>FAN1</i>                    | Diagnose                  | DNP                                                                                                                                  |
| Tubulointerstitial disease                                 | <i>NPHP1</i>                   | Diagnose                  | Consistent with chronic tubulointerstitial nephropathy, moderate                                                                     |
| CKD of Unknown Etiology                                    | <i>CUBN</i>                    | Diagnose, partial         | DNP                                                                                                                                  |
| Early, Severe, or Familial Onset Hypertension              | <i>COL4A4</i><br><i>COL4A5</i> | Diagnose                  | DNP                                                                                                                                  |

DNP= data not provided; classification based on clinical data provided
